# **“I wish I could work on school stuff.” Investigating the Impact of Remote Learning on Undergraduate Students’ Academic Success and Mental Health during the COVID-19 Lockdown**

**Joseph P. Nano<sup>1\*</sup>, William A. Catterall<sup>1</sup>, Michael L. Chang<sup>1</sup>, Mina H. Ghaly<sup>2</sup>**

<sup>1</sup> The Dartmouth Institute for Health Policy & Clinical Practice, Dartmouth Geisel School of Medicine, Hanover, NH, USA

<sup>2</sup> Harvard T.H. Chan School of Public Health, Department of Environmental Health, Boston, MA, USA

\* Corresponding author: [joseph.p.nano@gmail.com](mailto:joseph.p.nano@gmail.com)

## Abstract

**Objective:** To investigate how remote learning has affected undergraduate students' learning abilities, academic success, and mental health during the COVID-19 pandemic. **Methods:** This cross-sectional study took place between April and June 2020 in the United States. Participants completed a survey consisting of demographic questions, Depression, Anxiety, and Stress Scale-21 Items (DASS-21), and an open-ended question. We used a logistic regression model on objective variables and conducted a systematic thematic analysis of the open-ended response. **Results:** Our final sample consisted of 1,173 full-time undergraduate students in the United States. Most participants were public university students ( $n = 835$ , 71%) and reported that moving to remote learning had a negative impact on their school performance ( $n=802$ , 68%). Positive experiences in remote learning were associated with moving to their family's house ( $p<0.05$ ), living on campus in a dorm ( $p<0.05$ ), and no internet issues during classes ( $p<0.0001$ ). From the thematic analysis, we found six common themes among those who reported having a negative experience with remote learning: (1) adjusting to school, (2) dealing with mental health difficulties, (3) lack of motivation to do work, (4) adjusting to home environment, (5) feeling uncertain about occupational opportunities, and (6) disagreement in political views. **Limitations:** The results of this study may not be generalizable to undergraduate students outside of the United States due to differences in lockdown restrictions. **Conclusion:** Remote learning during COVID-19 had a negative impact on the majority of undergraduate students' academic performance and mental health.

**Keywords:** COVID-19, Remote Learning, Mental Health, Academic performance, University students

### Highlights:

- ❖ The majority of undergraduate students reported that remote learning negatively impacted their school performance.
- ❖ Students with non-STEM college majors experienced higher levels of stress, anxiety, and depression compared to students with STEM college majors.
- ❖ We found six common themes related to negative experiences with remote learning.

## Introduction

According to the World Health Organization (WHO) and the Centers for Disease Control and Prevention (CDC), mental health illness, such as anxiety and depressive disorders, is a global health priority and public health issue in the United States (U.S.) and globally.<sup>1-3</sup> The mental health of university students in particular represents a public health priority.<sup>4,5</sup> Studies have shown that university students report higher levels of depression and suicidality compared to the general population, with suicide rates continuing to rise over the years.<sup>6,7</sup> Teens and young adults are particularly vulnerable due to the transition from high school to college, a period notably associated with an onset of mental health problems.<sup>8</sup>

Depression, which encompasses multiple different depressive disorders, may start during adolescence and continue into adulthood.<sup>9,10</sup> There are documented gender disparities in depression, as women are more likely than men to experience depression.<sup>9,11</sup> Furthermore, depression continues to be a recurrent problem among undergraduate students with a prevalence as high as 49% on college campuses.<sup>12,13</sup> Mental health illness can affect students' energy level, concentration, and school performance.

The WHO declared the coronavirus disease outbreak of SARS-CoV-2 (COVID-19) a global pandemic on March 11, 2020.<sup>14</sup> The nationwide COVID-19 lockdowns forced college students to abruptly leave their campuses, disrupting their routines and intensifying mental health challenges.<sup>15</sup> This sudden transition, combined with the isolation and uncertainty of the pandemic, exacerbated existing issues, highlighting the urgent need to prioritize students' mental well-being during this unprecedented time.

In response to the mandated lockdowns, many academic institutions transitioned from in-person learning to remote learning.<sup>16</sup> As such, this led to subsequent changes to class syllabi and increased workload on educators.<sup>16</sup> There are differences between a typical planned online course and remote-learning courses hastily created during a pandemic.<sup>17</sup> There is limited research on the impact of emergency remote education on undergraduate students' academic performance during public health crises.<sup>17</sup>

The purpose of this study is to investigate the impact of universities moving classes to remote learning on undergraduate students' academic performance and mental health. We contribute to the literature both quantitatively and qualitatively by examining three key effects of the COVID-19 lockdown: first, how students adjusted their study habits; second, their overall satisfaction during the educational crisis; and third, provide recommendations for improving the remote learning experience based on reported positive and negative experiences.

## Materials and Methods

### *Participants*

We recruited undergraduate students enrolled in a private university, public university, or community college in the United States. For eligibility, participants were required to be at least 18 years old, enrolled as full-time undergraduate students, and members of the following graduating class years: Class of 2020, Class of 2021, Class of 2022, or Class of 2023. We conducted our recruitment phase between April and June 2020 through two methods: emails sent to undergraduate students at Boston College and online via Reddit, a popular social platform and forum. The recruitment process involved posting study invitations on over 20 university-related and survey-focused subreddits (online communities organized around specific topics), including r/SampleSize. We were unable to conduct in-person interviews due to the U.S. lockdown and public health restrictions.

### *Procedure*

Our survey consisted of four sections: social demographics, school adjustments, DASS-21 questions, and an optional open-ended question. The survey took approximately 10 minutes to complete. All participants provided informed consent before completing the survey, fully aware of potential risks and benefits, the confidentiality of their responses, and their right to withdraw from participation at any time. All respondents received the option to enter into a raffle to win one of 15 \$10 Amazon gift cards. Our study survey was available online for nine weeks, from April to June 2020. Our study received institutional review board (IRB) approval with exemption from the Boston College IRB in April 2020, ensuring compliance with U.S. federal regulations for the protection of human subjects.

### *Measures*

#### *DASS (Depression, Anxiety, and Stress Scale) 21*

Our survey included the widely used and validated 21-item DASS-21 scale to evaluate stress, anxiety, and depression levels during the COVID-19 pandemic.<sup>18</sup> We categorized scores into five categories: “normal” (depression: 0–9, anxiety: 0–7, stress: 0–14), “mild” (10–13, 8–9, 15–18), “moderate” (14–20, 10–14, 19–25), “severe” (21–27, 15–19, 26–33), and “extremely severe” (28+, 20+, 34+). Participants rated their experiences on a scale of “once a week or less” (score = 0), “2–3 times a week” (= 1), “4–6 times a week” (= 2), and “7 times a week or more” (= 3). We calculated the total score to determine participants’ severity levels.

### *Statistical analysis*

Statistical analyses were performed using R-Studio statistical software (Version 2023.06.1+524, R-Studio, PBC). Our first phase of analysis consisted of descriptive statistics that summarized

the sample's demographics and the distribution of the three mental health outcomes (stress, anxiety, and depression) among undergraduate students. We used t-tests to examine whether the transition to remote learning impacted students' DASS-21 scores for stress, anxiety, and depression levels. We used a predictive model to evaluate the influence of factors such as gender, frequency of leaving home, and academic performance after transitioning to remote learning. We conducted a thematic analysis of students' responses to the open-ended question in our survey. Two independent researchers (JN and MG) read responses and captured key concepts. Using an inductive approach, reviewers applied codes to each response to extract meaning from the text. These codes were grouped into broader categories, which were then synthesized into overarching themes. All conflicts were resolved.

## Results

### *Descriptive statistics*

A total of 1,734 responses were received, but after excluding students under 18 ( $n = 34$ ), part-time students ( $n = 135$ ), and incomplete responses ( $n = 392$ ), the final sample consisted of 1,173 participants. Among participants who reported negative experiences after moving to remote learning ( $n = 802$ , 68%), the majority of participants attended public universities ( $n = 541$ , 68%), followed by private universities ( $n = 254$ , 31%) (**Table 1**). For graduating class, participants were distributed across the class of 2020 ( $n = 130$ , 16%), 2021 ( $n = 209$ , 26%), 2022 ( $n = 227$ , 28%), and 2023 ( $n = 205$ , 26%). The sample's participants identified as 47% male, 49% female, and 4% as other. Housing status varied, with nearly half of the participants reporting that they had moved back to their family's house during the pandemic ( $n = 379$ , 47%), while a quarter of participants continued living with their parents ( $n = 210$ , 26%) (**Table 1**). Regarding internet connectivity, approximately half of participants reported no challenges ( $n = 421$ , 53%) (**Table 1**). For learning styles, the majority of participants reported preference for in-person learning ( $n = 716$ , 89%). For demographics, the majority of our participants identified as "Caucasian" ( $n = 401$ , 55%) or Asian or Pacific Islanders ( $n = 173$ , 24%). The majority of undergraduate students in this study used Zoom as their remote learning platform ( $n = 585$ , 73%), followed by "other" platforms ( $n = 208$ , 26%) (**Table 1**). We identified significant differences between students who reported a positive impact of remote learning on their academic performance and those who reported a negative impact. These differences were associated with challenges in internet connection ( $p < 0.001$ ), preference for type of learning ( $p < 0.001$ ), remote learning program used ( $p < 0.001$ ), and gender ( $p < 0.05$ ) (**Table 1**).

### *DASS-21*

Among all participants, 13% ( $n = 156$ ) reported experiencing "severe" or "extremely severe" stress (**Figure 1A**). Of these participants, 57% ( $n = 89$ ) were female, and 51% ( $n = 80$ ) identified as Caucasian. Notably, 81% ( $n = 126$ ) of participants within this group indicated that transitioning to remote learning negatively impacted their academic performance (**Figure 1A**).

Furthermore, within this group, 18% (n = 28) were members of the class of 2020, and 71% (n = 111) attended public schools (**Figure 1A**).

Approximately 18% (n = 212) of all participants reported experiencing “severe” or “extremely severe” anxiety (**Figure 1B**). Of these participants, 56% (n = 119) were female, and 51% (n = 109) identified as Caucasian. Additionally, 77% (n = 163) of participants within this group stated that moving to remote learning negatively impacted their academic performance, (**Figure 1B**). Within this group, 16% (n = 34) were members of the class of 2020, and 71% (n = 151) attended public schools (**Figure 1B**).

Approximately 25% (n = 298) of all claimed experiencing “severe” or “extremely severe” depression (**Figure 1C**). Of these participants, 53% (n = 157) were female, and 51% (n = 153) identified as Caucasian. Furthermore, 80% (n = 238) of participants within this group reported that moving to remote learning negatively impacted their academic performance (**Figure 1C**). Within this group, 18% (n = 53) were members of the class of 2020, while 72% (n = 215) attended public schools (**Figure 1C**).

We received responses from 647 undergraduate students enrolled full-time in an educational institution with Science, Technology, Engineering, and Mathematics (STEM) majors and 520 undergraduate students enrolled full-time with non-STEM majors (**Figure 2**). We found undergraduate students with non-STEM majors to have significantly higher levels of stress ( $p < 0.001$ ), anxiety ( $p < 0.001$ ), and depression ( $p < 0.01$ ) compared to students with STEM majors (**Figure 2**).

### ***Predictive model***

Our logistic regression model revealed several factors significantly associated with undergraduate students' experience with remote learning in the United States (**Table 2**). Undergraduate students who preferred remote learning (OR = 13.106, 95% CI: 8.296–20.707,  $p < 0.001$ ) or had no specific preference for learning type (OR = 5.297, 95% CI: 3.267–8.590,  $p < 0.001$ ) were significantly more likely to report a better remote learning experience compared to those who preferred in-person learning (**Table 2**). Regarding housing status, students who moved to their family's house (OR = 1.939, 95% CI: 1.145–3.285,  $p = 0.014$ ), stayed on campus in a dorm (OR = 3.158, 95% CI: 1.105–9.022,  $p = 0.032$ ), or reported "other" housing arrangements (OR = 2.589, 95% CI: 1.275–5.253,  $p = 0.008$ ) were more likely to have a different experience compared to those living off-campus (**Table 2**). Students with internet issues were significantly less likely to report a positive remote learning experience (OR = 0.448, 95% CI: 0.323–0.622,  $p < 0.001$ ). Those using Zoom as a remote learning platform were less likely to have a positive experience compared to other platforms (OR = 0.610, 95% CI: 0.432–0.861,  $p = 0.005$ ). No significant associations were found for gender, school type, or the number of professors who changed their syllabus (**Table 2**).

## ***Thematic Analysis***

We received 563 survey responses to the open-ended question, from which 215 responses contributed to the thematic analysis (**Table 3**). A majority of the responses were between two and three sentences in length. Responses that were nondescript, too brief, or lacked an otherwise unclear theme(s) were excluded. Through the thematic analysis, we identified six common themes among those who reported having a negative experience with remote learning (**Table 3**). These included: (1) adjusting to an online learning environment, (2) dealing with mental health difficulties, (3) lack of motivation to do work, (4) adjusting to the home environment, (5) feeling uncertain about future opportunities (educational, and for soon-to-be graduates, professional), and (6) political tension (**Table 3**).

## **Discussion**

### ***Summary of results***

To our knowledge, this is the first study to explore undergraduate students' experience during the COVID-19 lockdown between April and June 2020 across over twenty universities in the United States. The results of our study revealed that the majority of participants (n = 802, 68%) reported that moving to remote learning had a negative impact on their academic performance. Overall, we found three significant results in this study: (1) experiencing internet connection issues was one of the predictors of reporting a negative experience with remote learning, (2) students who reported a negative experience with remote learning had higher severity levels of stress, anxiety, and depression, and (3) we identified six common themes associated with positive and negative experiences with remote learning during COVID-19 lockdown.

### ***Results in context***

Students who reported having a negative experience with remote learning may have had more severe and extremely severe levels of stress, anxiety, and depression due to concerns about grades and how that influences access to future opportunities.<sup>19</sup> While the majority of participants experienced “normal” levels of stress, anxiety, and depression, undergraduate students during lockdown experienced higher levels of “severity” and “extreme severity” compared to other studies conducted prior to the pandemic.<sup>20</sup> Our results are consistent with articles and reviews that investigated the impact of remote learning on children, adolescents and primary school students.<sup>21,22</sup> Also, our results regarding remote learning experience are similar to studies conducted outside of the United States.<sup>23,24</sup>

### ***Limitations***

One limitation of this study is that results may not be generalizable to students outside the United States. Lockdown policies may have differed across countries, which may have influenced students' experience with remote learning during the COVID-19 lockdown. Another limitation is

that we excluded all responses from international students, graduate students, and undergraduate students under age 18, which would also impact generalizability to other undergraduate groups in the United States.

### ***Implications for practice***

In light of the findings from this study, future public health research and policies should focus on strategies to better support undergraduate students during future pandemics or similar emergencies that may disrupt traditional learning environments. One important recommendation is for universities and governments to ensure equitable access to reliable internet and technology resources, given that connectivity issues were a significant predictor of negative remote learning experiences. Public health agencies could collaborate with educational institutions to establish contingency plans that provide students with technological support, mental health resources, and academic flexibility during emergencies.

Moreover, addressing mental health should be a key priority in future pandemic preparedness plans. Universities should implement proactive interventions such as virtual mental health counseling, peer support groups, and workshops on coping strategies to mitigate the stress, anxiety, and depression experienced by students. Integrating public health guidelines with educational policies can ensure that mental health support systems are embedded in academic infrastructures.

Additionally, schools should provide students with education and training on how to adapt to studying in the home environment, especially in situations where parents and other family members are present. Workshops or online modules on effective time management, setting boundaries with family, and creating focused study spaces can equip students with practical tools to enhance productivity at home. These strategies are critical to minimizing distractions and stress, fostering a more conducive learning environment, and ensuring students can maintain academic performance during prolonged disruptions.

### **Conclusion**

Remote learning had a negative impact on the majority of U.S. undergraduate students' academic performance and mental health during the COVID-19 pandemic. Future research and policy efforts should prioritize strategies to alleviate the negative impacts of sudden educational disruptions during public health crises.



## References

1. Cassano P, Fava M. Depression and public health. *J Psychosom Res.* 2002;53(4):849-857. doi:10.1016/s0022-3999(02)00304-5
2. Mental Health is a Global Public Health Issue. Centers for Disease Control and Prevention. August 31, 2024. Accessed September 8, 2024. [https://www.cdc.gov/pcd/collections/Mental\\_Health\\_Is\\_a\\_Global\\_Public\\_Health\\_Issue.htm](https://www.cdc.gov/pcd/collections/Mental_Health_Is_a_Global_Public_Health_Issue.htm)
3. Out of the shadows: making mental health a global priority. Accessed December 23, 2024. <https://www.who.int/director-general/speeches/detail/out-of-the-shadows-making-mental-health-a-global-priority>
4. Pedrelli P, Nyer M, Yeung A, Zulauf C, Wilens T. College students: Mental health problems and treatment considerations. *Acad Psychiatry.* 2015;39(5):503-511. doi:10.1007/s40596-014-0205-9
5. O'Malley BY, Etoundi-Ngono E, Hua J, Nano JP, Pipas CF. Evaluation of a pilot wellness elective for Master of Public Health students during the COVID-19 pandemic. *Int J Environ Res Public Health.* 2024;21(5):590. doi:10.3390/ijerph21050590
6. Eisenberg D, Gollust SE, Golberstein E, Hefner JL. Prevalence and correlates of depression, anxiety, and suicidality among university students. *Am J Orthopsychiatry.* 2007;77(4):534-542. doi:10.1037/0002-9432.77.4.534
7. Gunnell D, Caul S, Appleby L, John A, Hawton K. The incidence of suicide in University students in England and Wales 2000/2001-2016/2017: Record linkage study. *J Affect Disord.* 2020;261:113-120. doi:10.1016/j.jad.2019.09.079
8. Auerbach RP, Alonso J, Axinn WG, et al. Mental disorders among college students in the World Health Organization World Mental Health Surveys. *Psychol Med.* 2016;46(14):2955-2970. doi:10.1017/S0033291716001665
9. Wilson S, Dumornay NM. Rising rates of adolescent depression in the United States: Challenges and opportunities in the 2020s. *J Adolesc Health.* 2022;70(3):354-355. doi:10.1016/j.jadohealth.2021.12.003
10. Adams SH, Schaub JP, Nagata JM, Park MJ, Brindis CD, Irwin CE Jr. Young adult anxiety or depressive symptoms and mental health service utilization during the COVID-19 pandemic. *J Adolesc Health.* 2022;70(6):985-988. doi:10.1016/j.jadohealth.2022.02.023
11. Albert PR. Why is depression more prevalent in women? *J Psychiatry Neurosci.* 2015;40(4):219-221. doi:10.1503/jpn.150205
12. Luo MM, Hao M, Li XH, Liao J, Wu CM, Wang Q. Prevalence of depressive tendencies among college students and the influence of attributional styles on depressive tendencies in the post-pandemic era. *Front Public Health.* 2024;12:1326582.

doi:10.3389/fpubh.2024.1326582

13. Acharya L, Jin L, Collins W. College life is stressful today - Emerging stressors and depressive symptoms in college students. *J Am Coll Health*. 2018;66(7):655-664. doi:10.1080/07448481.2018.1451869
14. CDC. CDC Museum COVID-19 Timeline. Centers for Disease Control and Prevention. March 15, 2023. Accessed December 23, 2024. <https://www.cdc.gov/museum/timeline/covid19.html>
15. Nano JP, Ghaly MH, Fan W. Lessons From Early COVID-19: Associations With Undergraduate Students' Academic Performance, Social Life, and Mental Health in the United States. *Int J Public Health*. 2022;67:1604806. doi:10.3389/ijph.2022.1604806
16. Wilhelm J, Mattingly S, Gonzalez VH. Perceptions, satisfactions, and performance of undergraduate students during Covid-19 emergency remote teaching. *Anat Sci Educ*. 2022;15(1):42-56. doi:10.1002/ase.2161
17. Bovill H. Too much information: exploring technology-mediated abuse in higher education online learning and teaching spaces resulting from COVID-19 and emergency remote education. *High Educ*. Published online October 27, 2022:1-17. doi:10.1007/s10734-022-00947-0
18. Lovibond PF, Lovibond SH. The structure of negative emotional states: comparison of the Depression Anxiety Stress Scales (DASS) with the Beck Depression and Anxiety Inventories. *Behav Res Ther*. 1995;33(3):335-343. doi:10.1016/0005-7967(94)00075-u
19. Agnafors S, Barmark M, Sydsjö G. Mental health and academic performance: a study on selection and causation effects from childhood to early adulthood. *Soc Psychiatry Psychiatr Epidemiol*. 2021;56(5):857-866. doi:10.1007/s00127-020-01934-5
20. Beiter R, Nash R, McCrady M, et al. The prevalence and correlates of depression, anxiety, and stress in a sample of college students. *J Affect Disord*. 2015;173:90-96. doi:10.1016/j.jad.2014.10.054
21. Saulle R, De Sario M, Bena A, et al. School closures and mental health, wellbeing and health behaviours among children and adolescents during the second COVID-19 wave: a systematic review of the literature. *Epidemiol Prev*. 2022;46(5-6):333-352. doi:10.19191/EP22.5-6.A542.089
22. Ye FTF, Gao X, Sin KF, Yang L. Remote learning and mental health during the societal lockdown: a study of primary school students and parents in times of COVID-19. *BMC Public Health*. 2023;23(1):1106. doi:10.1186/s12889-023-16040-9
23. Asanov I, Flores F, McKenzie D, Mensmann M, Schulte M. Remote-learning, time-use, and mental health of Ecuadorian high-school students during the COVID-19 quarantine. *World Dev*. 2021;138(105225):105225. doi:10.1016/j.worlddev.2020.105225

24. Lischer S, Safi N, Dickson C. Remote learning and students' mental health during the Covid-19 pandemic: A mixed-method enquiry. *Prospects (Paris)*. 2022;51(4):589-599. doi:10.1007/s11125-020-09530-w
25. Sharma A, Minh Duc NT, Luu Lam Thang T, et al. A Consensus-Based Checklist for Reporting of Survey Studies (CROSS). *J Gen Intern Med*. 2021;36(10):3179-3187. doi:10.1007/s11606-021-06737-1

### ***Conflicts of interest***

Authors have no conflict of interest.

### ***Funding***

This study received no funding.

### ***CRediT authorship contribution statement***

**Joseph P. Nano:** conceptualization, methodology, formal analysis, and writing the original draft.

**William A. Catterall:** methodology, writing the original draft. **Michael L. Chang:**

methodology, writing the original draft. **Mina H. Ghaly:** methodology, formal analysis, writing the original draft.

### ***Data availability statement***

The data which supports the findings of this research are available upon request of the authors.

### ***Acknowledgments***

Special thanks to Dr. Wen Fan from Boston College for all her support over the years.

## Tables & Figures

**Table 1.** Baseline characteristics among students who stated that moving to remote learning had a negative impact on their school performance compared to students who claimed that remote learning had a positive impact on their school performance <sup>1,2</sup>

|                                             | Negatively impacted<br>( <i>N</i> = 802), No. (%) | Positively impacted<br>( <i>N</i> = 371), No. (%) | P-value   |
|---------------------------------------------|---------------------------------------------------|---------------------------------------------------|-----------|
| <b>Change in class syllabus<sup>3</sup></b> |                                                   |                                                   |           |
| All of them did                             | 215 (27)                                          | 99 (27)                                           | 0.829     |
| Half of them did                            | 67 (8)                                            | 24 (7)                                            |           |
| Most of them did                            | 312 (39)                                          | 145 (39)                                          |           |
| None of them did                            | 45 (6)                                            | 22 (6)                                            |           |
| Some of them did                            | 163 (20)                                          | 81 (22)                                           |           |
| <b>Frequency of leaving home</b>            |                                                   |                                                   |           |
| Everyday                                    | 283 (35)                                          | 154 (42)                                          | 0.161     |
| Once a week                                 | 263 (33)                                          | 103 (28)                                          |           |
| Other                                       | 105 (13)                                          | 43 (12)                                           |           |
| Yes                                         | 150 (19)                                          | 70 (19)                                           |           |
| <b>Gender</b>                               |                                                   |                                                   |           |
| Female                                      | 366 (50)                                          | 162 (50)                                          | 0.031*    |
| Male                                        | 344 (47)                                          | 161 (49)                                          |           |
| Other                                       | 22 (3)                                            | 22 (1)                                            |           |
| <b>Graduating class</b>                     |                                                   |                                                   |           |
| Class of 2020                               | 130 (16)                                          | 66 (18)                                           | 0.563     |
| Class of 2021                               | 209 (26)                                          | 102 (28)                                          |           |
| Class of 2022                               | 227 (28)                                          | 107 (29)                                          |           |
| Class of 2023                               | 205 (26)                                          | 81 (22)                                           |           |
| <b>Housing status</b>                       |                                                   |                                                   |           |
| Living off-campus with friends              | 118 (15)                                          | 45 (12)                                           | 0.052     |
| Moved to family's apartment                 | 29 (4)                                            | 10 (3)                                            |           |
| Moved to my family's house                  | 379 (47)                                          | 166 (45)                                          |           |
| Still living on campus in dorm              | 15 (2)                                            | 9 (2)                                             |           |
| Still living with my parents                | 210 (26)                                          | 99 (27)                                           |           |
| Other                                       | 50 (6)                                            | 42 (11)                                           |           |
| <b>Internet connection challenges</b>       |                                                   |                                                   |           |
| No                                          | 421 (53)                                          | 268 (72)                                          | <0.001*** |
| Yes                                         | 380 (47)                                          | 103 (28)                                          |           |
| <b>Preference for type of learning</b>      |                                                   |                                                   |           |
| In-person                                   | 716 (89)                                          | 188 (51)                                          | <0.001*** |
| No preference                               | 47 (6)                                            | 62 (17)                                           |           |

|                                     |          |          |          |
|-------------------------------------|----------|----------|----------|
| Remote-learning                     | 39 (5)   | 121 (33) |          |
| <b>Race</b>                         |          |          |          |
| African American                    | 27 (4)   | 13 (4)   | 0.493    |
| Asian or Pacific islander           | 173 (24) | 90 (28)  |          |
| Caucasian                           | 401 (55) | 163 (50) |          |
| Hispanic or Latino                  | 62 (9)   | 37 (11)  |          |
| Native American                     | 3 (0)    | 1 (0)    |          |
| Other                               | 34 (5)   | 12 (4)   |          |
| Prefer not to answer                | 26 (3)   | 9 (3)    |          |
| <b>Remote learning program used</b> |          |          |          |
| Google Hangout                      | 5 (1)    | 3 (1)    | 0.001*** |
| Other                               | 208 (26) | 136 (36) |          |
| Skype                               | 4 (0)    | 0 (0)    |          |
| Zoom                                | 585 (73) | 232 (63) |          |
| <b>School type</b>                  |          |          |          |
| Community college                   | 4 (1)    | 8 (1)    | 0.170    |
| Private                             | 254 (31) | 327 (28) |          |
| Public                              | 541 (68) | 835 (71) |          |

<sup>1</sup> All percentages were rounded to the whole number.

<sup>2</sup> We excluded 52 participants from this analysis who did not answer the following questions: “How was your school performance affected by moving your classes to remote learning amid COVID-19 concerns?”

<sup>3</sup> “Change in class syllabus” refers to the question, “How many professors at your university changed their class syllabus?”

**Table 2.** Logistic regression model analysis of sociodemographic and other factors impacting undergraduate students' experience with remote learning experience in the United States

|                                             | Estimate (Standard Error) |                | Odds Ratio (95% CI) <sup>2</sup> | Z-value | P-value <sup>3</sup> |
|---------------------------------------------|---------------------------|----------------|----------------------------------|---------|----------------------|
|                                             | Adjusted <sup>2</sup>     | Standard Error |                                  |         |                      |
| <b>Change in class syllabus<sup>1</sup></b> |                           |                |                                  |         |                      |
| All of them did                             | Reference                 |                | 1.00                             |         |                      |
| Half of them did                            | -0.451                    | 0.337          | 0.637 (0.329, 1.233)             | -1.338  | 0.181                |
| Most of them did                            | 0.043                     | 0.196          | 1.043 (0.711, 1.531)             | 0.217   | 0.828                |
| None of them did                            | 0.027                     | 0.501          | 1.028 (0.385, 2.743)             | 0.055   | 0.956                |
| Some of them did                            | 0.133                     | 0.248          | 1.143 (0.703, 1.858)             | 0.538   | 0.591                |
| <b>Gender</b>                               |                           |                |                                  |         |                      |
| Female                                      | Reference                 |                | 1.00                             |         |                      |
| Male                                        | -0.017                    | 0.159          | 0.984 (0.720, 1.343)             | -0.104  | 0.917                |
| Other                                       | -1.117                    | 0.686          | 0.327 (0.085, 1.255)             | -1.629  | 0.103                |
| <b>Preference for type of learning</b>      |                           |                |                                  |         |                      |
| In-person                                   | Reference                 |                | 1.00                             |         |                      |
| No preference                               | 1.667                     | 0.243          | 5.297 (3.267, 8.590)             | 6.871   | <0.001***            |
| Remote-learning                             | 2.57                      | 0.233          | 13.106 (8.296, 20.707)           | 11.027  | <0.001***            |
| <b>Housing status</b>                       |                           |                |                                  |         |                      |
| Living off-campus                           | Reference                 |                | 1.00                             |         |                      |
| Moved to family's apartment                 | -0.062                    | 0.542          | 0.939 (0.336, 2.626)             | -0.115  | 0.908                |
| Moved to my family's house                  | 0.662                     | 0.269          | 1.939 (1.145, 3.285)             | 2.463   | 0.014*               |
| Still living on campus in dorm              | 1.150                     | 0.536          | 3.158 (1.105, 9.022)             | 2.147   | 0.032*               |
| Still living with my parents                | 0.342                     | 0.289          | 1.411 (0.801, 2.487)             | 1.184   | 0.236                |
| Other                                       | 0.951                     | 0.361          | 2.589 (1.275, 5.253)             | 2.634   | 0.008**              |
| <b>Internet issues</b>                      |                           |                |                                  |         |                      |
| No                                          | Reference                 |                | 1.00                             |         |                      |
| Yes                                         | -0.803                    | 0.167          | 0.448 (0.323, 0.622)             | -4.792  | <0.001***            |
| <b>Remote Learning Program</b>              |                           |                |                                  |         |                      |
| Other                                       | Reference                 |                | 1.00                             |         |                      |
| Google Hangout                              | 0.444                     | 0.930          | 1.559 (0.252, 9.651)             | 0.478   | 0.633                |
| Skype                                       | -14.345                   | 380.9          | 0 (0)                            | -0.038  | 0.970                |
| Zoom                                        | -0.494                    | 0.176          | 0.610 (0.432, 0.861)             | -2.810  | 0.005**              |
| <b>School type</b>                          |                           |                |                                  |         |                      |
| Private                                     | Reference                 |                | 1.00                             |         |                      |
| Community college                           | 0.734                     | 0.897          | 2.083 (0.359, 12.087)            | 0.818   | 0.413                |
| Public                                      | 0.327                     | 0.190          | 1.387 (0.955, 2.015)             | 1.719   | 0.086                |

<sup>1</sup> "Change in class syllabus" refers to the question, "How many professors at your university changed their class syllabus?"

<sup>2</sup> Adjusted for class syllabus, gender, graduating class, housing status, internet status, remote learning program, preference for learning, school type, and race. Graduating class (Class of 2020, 2021, 2022, and 2023) was not a predictor of students' experience with remote learning ( $p > 0.05$ ).

<sup>3</sup> Significance codes: 0 '\*\*\*\*' 0.001 '\*\*' 0.01 '\*' 0.05



**Table 3.** Thematic analysis of open-ended question based on students' responses (n = 215)

| <b>Extracted themes</b>                     | <b>Percent of participants<br/>(Number of responses)</b> | <b>Type of code</b> | <b>Excerpts</b>                                                                                                                                                                                                                                                                                                                                                                                                                                                                                                                                                                                                                                                                                                                                                                                                                                             |
|---------------------------------------------|----------------------------------------------------------|---------------------|-------------------------------------------------------------------------------------------------------------------------------------------------------------------------------------------------------------------------------------------------------------------------------------------------------------------------------------------------------------------------------------------------------------------------------------------------------------------------------------------------------------------------------------------------------------------------------------------------------------------------------------------------------------------------------------------------------------------------------------------------------------------------------------------------------------------------------------------------------------|
| Adjusting to an online learning environment | 20% (n = 44)                                             | School              | <p><b>Negative experience:</b> <i>“I feel like I have less access to academic advising because the only way to reach people is through emails and some professors have not answered my emails. I miss having to walk between classes as a break.”</i></p> <p><b>Positive experience:</b> <i>“Feeling motivated now that summer classes have started. Still adjusting to remote lectures and managing time for the additional class work.”</i></p>                                                                                                                                                                                                                                                                                                                                                                                                           |
| Adjusting to home environment               | 13% (n = 28)                                             | Home                | <p><b>Negative experience:</b> <i>“It’s difficult to focus at home because my parents are working over the phone and I can hear their calls even with the doors closed.”</i></p> <p><b>Positive experience:</b> <i>“Happier cause I can work from home which gives me more free time since I don't have to commute”</i></p>                                                                                                                                                                                                                                                                                                                                                                                                                                                                                                                                 |
| Dealing with mental health difficulties     | 10% (n = 22)                                             | Mental health       | <p><b>Negative experience:</b> <i>“Depressed, my mental illness has been slowly getting worse over the last couple of months, and the idea that I might not be able to go back to school in the Fall makes me feel so hopeless and unenthusiastic about my happiness getting better any time soon.”</i></p> <p><b>Positive experience:</b> <i>“Anxious, but my typical depression symptoms have become more manageable.”</i></p>                                                                                                                                                                                                                                                                                                                                                                                                                            |
| Dealing with political tension              | 3% (n = 6)                                               | Politics            | <p><b>Negative experience:</b> <i>“I feel as though the country and the world reacted with a knee-jerk reaction towards containing the virus. My work got shut down so now I’m worried about how I’m going to pay for my next semester, as well as getting a job once I return to school.”</i></p> <p><b>Positive experience:</b> <i>“I have been feeling pretty good. I don't have any stress about school anymore, but now I'm worried about the economic recession that will be in full swing when I graduate. I worry about not being able to find a job. It keeps me up at night sometimes. I'm doing interview practice, but some days I don't feel up to it, which I know is normal. I've been focusing a lot on cooking and making dinner for my family. When I get to share that time with my family, I'm most happy and have no worries.”</i></p> |

|                                              |              |            |                                                                                                                                                                                                                                                                                                                                                                                                                                                                                            |
|----------------------------------------------|--------------|------------|--------------------------------------------------------------------------------------------------------------------------------------------------------------------------------------------------------------------------------------------------------------------------------------------------------------------------------------------------------------------------------------------------------------------------------------------------------------------------------------------|
| Feeling uncertain about future opportunities | 11% (n = 24) | Future     | <p><b>Negative experience:</b> <i>“I am a transfer student and I am getting a lot of anxiety about my summer job, transferring, and my future in general.”</i></p> <p><b>Positive experience:</b> <i>“Fine overall, but sometimes it's hard to not panic about the state of the world. I have no idea when things are going to return to normal, and sometimes it's hard to believe that they ever will return to normal.”</i></p>                                                         |
| Lack of motivation to do work                | 12% (n = 26) | Motivation | <p><b>Negative experience:</b> <i>“I have ADHD and online learning has been a struggle. When I am in my home all day, it is extremely difficult to get started on tasks and focus effectively. I have never failed a class before and now I am graduating late because I failed a course!”</i></p> <p><b>Positive experience:</b> <i>“I have been feeling a little more hopeful for the future, because I am graduating and got accepted into my program of choice for next year.”</i></p> |

**Figure 1.** Distribution of DASS-21 categories (A) stress, (B) anxiety, and (C) depression among students who reported that moving to remote learning had a positive impact or negative impact on their school performance during the COVID-19 lockdown in the United States

(A)

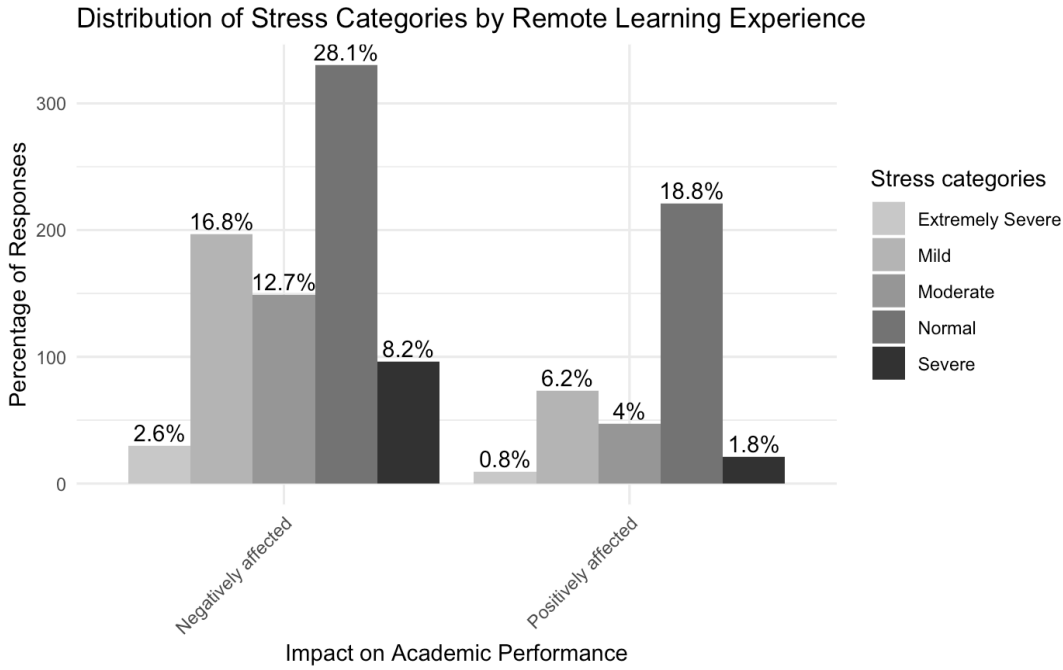

(B)

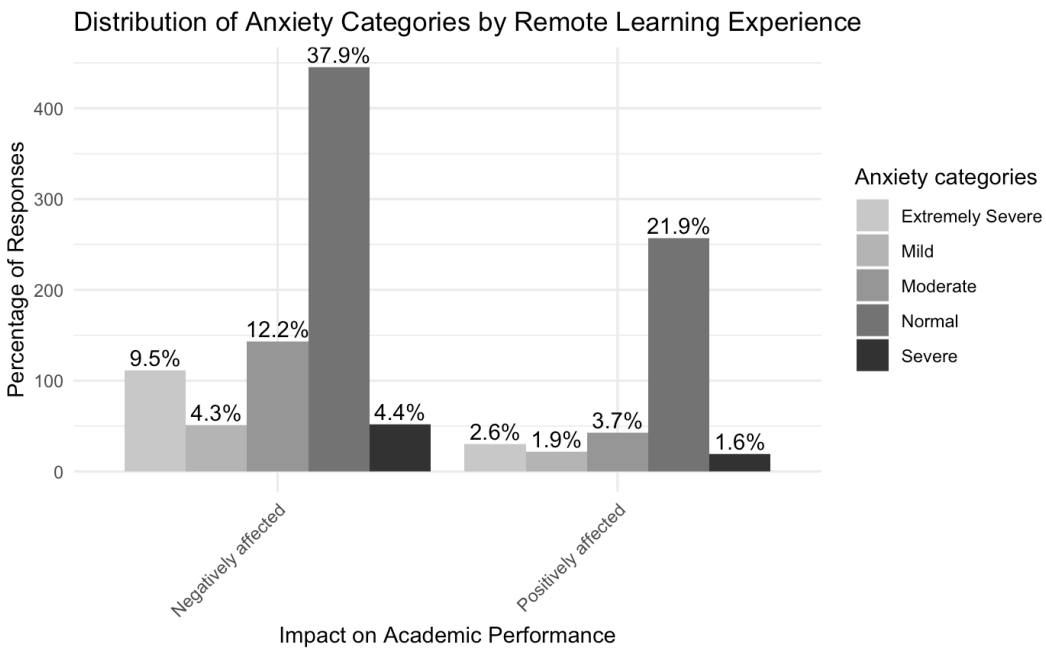

(C)

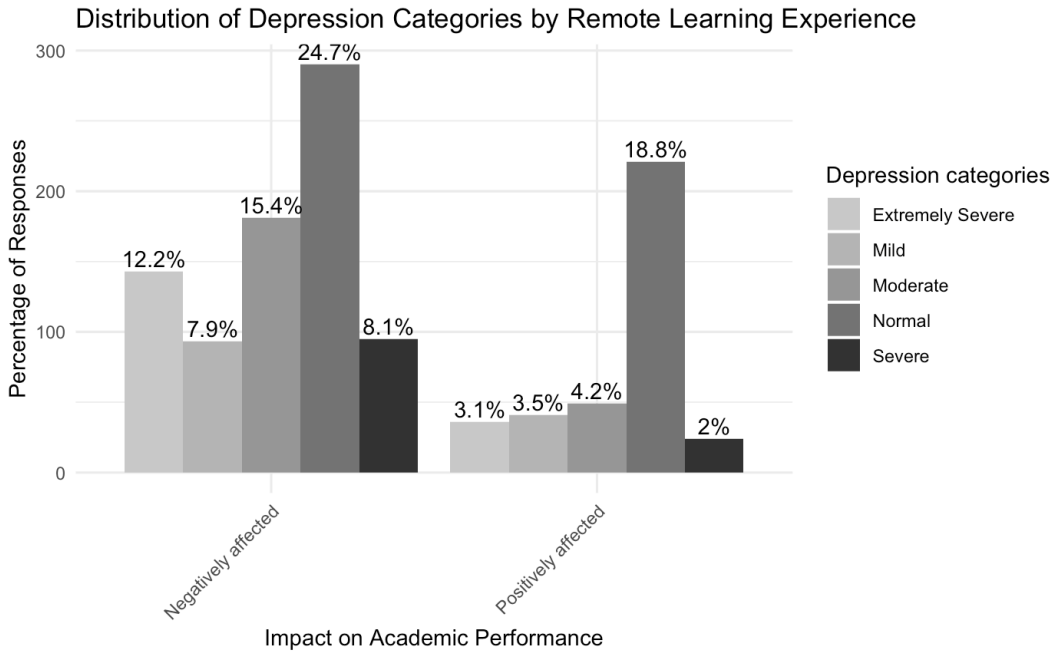

**Figure 2.** Stress, Anxiety, and Depression mean scores among undergraduate students based on college major, categorized as STEM (n = 647) and Non-STEM (n = 520) majors<sup>1</sup>

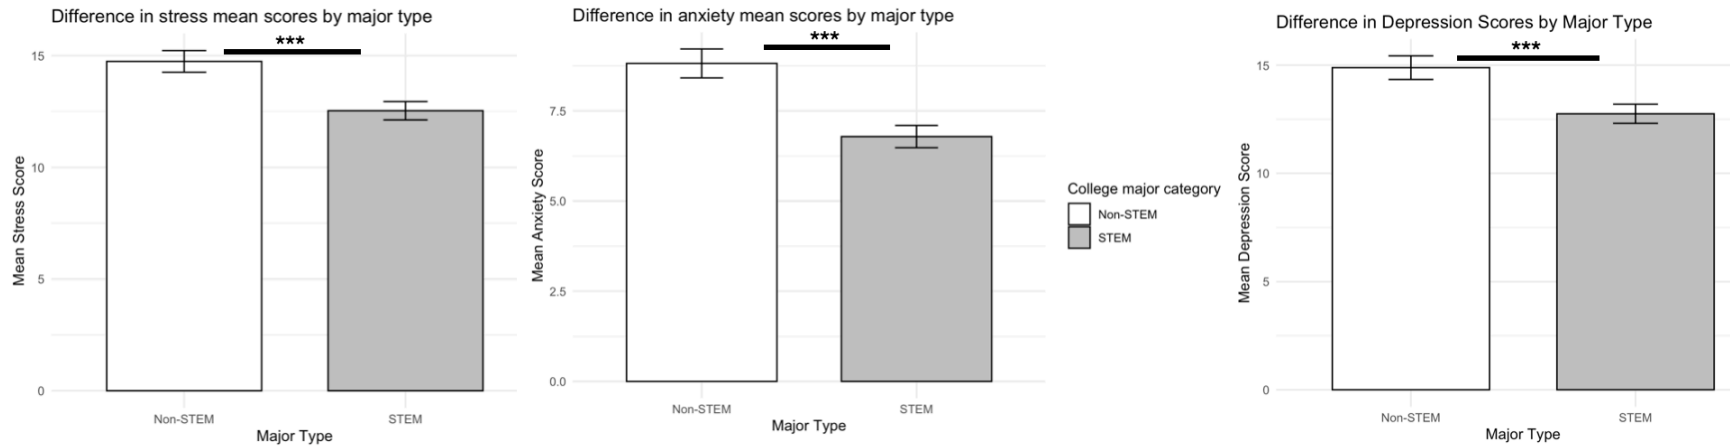

<sup>1</sup>**Note:** \*\*\* refers to  $p < 0.01$ . Stress ( $t = 3.49$ ,  $df = 1171$ ,  $p\text{-value} < 0.001$ ), anxiety ( $t = 4.08$ ,  $df = 1171$ ,  $p\text{-value} < 0.001$ ), and depression ( $t = 3.07$ ,  $df = 1171$ ,  $p\text{-value} < 0.01$ )

## APPENDICES

### Appendix 1. Checklist for Reporting Of Survey Studies (CROSS)<sup>25</sup>

| Section/topic             | Item | Item description                                                                                                                                                                                                                                                                                                                                                  | Reported on page # |
|---------------------------|------|-------------------------------------------------------------------------------------------------------------------------------------------------------------------------------------------------------------------------------------------------------------------------------------------------------------------------------------------------------------------|--------------------|
| <b>Title and abstract</b> |      |                                                                                                                                                                                                                                                                                                                                                                   |                    |
| Title and abstract        | 1a   | State the word “survey” along with a commonly used term in title or abstract to introduce the study’s design.                                                                                                                                                                                                                                                     | 2                  |
|                           | 1b   | Provide an informative summary in the abstract, covering background, objectives, methods, findings/results, interpretation/discussion, and conclusions.                                                                                                                                                                                                           | 2                  |
| <b>Introduction</b>       |      |                                                                                                                                                                                                                                                                                                                                                                   |                    |
| Background                | 2    | Provide a background about the rationale of study, what has been previously done, and why this survey is needed.                                                                                                                                                                                                                                                  | 3                  |
| Purpose/aim               | 3    | Identify specific purposes, aims, goals, or objectives of the study.                                                                                                                                                                                                                                                                                              | 3                  |
| <b>Methods</b>            |      |                                                                                                                                                                                                                                                                                                                                                                   |                    |
| Study design              | 4    | Specify the study design in the methods section with a commonly used term (e.g., cross-sectional or longitudinal).                                                                                                                                                                                                                                                | 4                  |
| Data collection methods   | 5a   | Describe the questionnaire (e.g., number of sections, number of questions, number and names of instruments used).                                                                                                                                                                                                                                                 | 4                  |
|                           | 5b   | Describe all questionnaire instruments that were used in the survey to measure particular concepts. Report target population, reported validity and reliability information, scoring/classification procedure, and reference links (if any).                                                                                                                      | 4                  |
|                           | 5c   | Provide information on pretesting of the questionnaire, if performed (in the article or in an online supplement). Report the method of pretesting, number of times questionnaire was pre-tested, number and demographics of participants used for pretesting, and the level of similarity of demographics between pre-testing participants and sample population. | 4                  |
|                           | 5d   | Questionnaire if possible, should be fully provided (in the article, or as appendices or as an online supplement).                                                                                                                                                                                                                                                | 4                  |

|                        |     |                                                                                                                                                                                                                                                               |   |
|------------------------|-----|---------------------------------------------------------------------------------------------------------------------------------------------------------------------------------------------------------------------------------------------------------------|---|
| Sample characteristics | 6a  | Describe the study population (i.e., background, locations, eligibility criteria for participant inclusion in survey, exclusion criteria).                                                                                                                    | 4 |
|                        | 6b  | Describe the sampling techniques used (e.g., single stage or multistage sampling, simple random sampling, stratified sampling, cluster sampling, convenience sampling). Specify the locations of sample participants whenever clustered sampling was applied. | 4 |
|                        | 6c  | Provide information on sample size, along with details of sample size calculation.                                                                                                                                                                            | 4 |
|                        | 6d  | Describe how representative the sample is of the study population (or target population if possible), particularly for population-based surveys.                                                                                                              | 4 |
| Survey administration  | 7a  | Provide information on modes of questionnaire administration, including the type and number of contacts, the location where the survey was conducted (e.g., outpatient room or by use of online tools, such as SurveyMonkey).                                 | 4 |
|                        | 7b  | Provide information of the survey's time frame, such as periods of recruitment, exposure, and follow-up days.                                                                                                                                                 | 4 |
|                        | 7c  | Provide information on the entry process:<br>→For non-web-based surveys, provide approaches to minimize human error in data entry.<br>→For web-based surveys, provide approaches to prevent “multiple participation” of participants.                         | 4 |
| Study preparation      | 8   | Describe any preparation process before conducting the survey (e.g., interviewers’ training process, advertising the survey).                                                                                                                                 | 4 |
| Ethical considerations | 9a  | Provide information on ethical approval for the survey if obtained, including informed consent, institutional review board [IRB] approval, Helsinki declaration, and good clinical practice [GCP] declaration (as appropriate).                               | 4 |
|                        | 9b  | Provide information about survey anonymity and confidentiality and describe what mechanisms were used to protect unauthorized access.                                                                                                                         | 4 |
| Statistical analysis   | 10a | Describe statistical methods and analytical approaches. Report the statistical software that was used for data analysis.                                                                                                                                      | 5 |
|                        | 10b | Report any modification of variables used in the analysis, along with reference (if available).                                                                                                                                                               | 5 |
|                        | 10c | Report details about how missing data was handled. Include rate of missing items, missing data mechanism (i.e., missing completely at random [MCAR], missing at random [MAR] or missing not at random [MNAR]) and                                             | 5 |

|                            |     |                                                                                                                                                                                                                                  |     |
|----------------------------|-----|----------------------------------------------------------------------------------------------------------------------------------------------------------------------------------------------------------------------------------|-----|
|                            |     | methods used to deal with missing data (e.g., multiple imputation).                                                                                                                                                              |     |
|                            | 10d | State how non-response error was addressed.                                                                                                                                                                                      | 5   |
|                            | 10e | For longitudinal surveys, state how loss to follow-up was addressed.                                                                                                                                                             | N/A |
|                            | 10f | Indicate whether any methods such as weighting of items or propensity scores have been used to adjust for non-representativeness of the sample.                                                                                  | N/A |
|                            | 10g | Describe any sensitivity analysis conducted.                                                                                                                                                                                     | 5   |
| <b>Results</b>             |     |                                                                                                                                                                                                                                  |     |
| Respondent characteristics | 11a | Report numbers of individuals at each stage of the study. Consider using a flow diagram, if possible.                                                                                                                            | 5   |
|                            | 11b | Provide reasons for non-participation at each stage, if possible.                                                                                                                                                                | N/A |
|                            | 11c | Report response rate, present the definition of response rate or the formula used to calculate response rate.                                                                                                                    | 5   |
|                            | 11d | Provide information to define how unique visitors are determined. Report number of unique visitors along with relevant proportions (e.g., view proportion, participation proportion, completion proportion).                     | 5   |
| Descriptive results        | 12  | Provide characteristics of study participants, as well as information on potential confounders and assessed outcomes.                                                                                                            | 5   |
| Main findings              | 13a | Give unadjusted estimates and, if applicable, confounder-adjusted estimates along with 95% confidence intervals and p-values.                                                                                                    | N/A |
|                            | 13b | For multivariable analysis, provide information on the model building process, model fit statistics, and model assumptions (as appropriate).                                                                                     | N/A |
|                            | 13c | Provide details about any sensitivity analysis performed. If there is a considerable amount of missing data, report sensitivity analyses comparing the results of complete cases with that of the imputed dataset (if possible). | N/A |
| <b>Discussion</b>          |     |                                                                                                                                                                                                                                  |     |
| Limitations                | 14  | Discuss the limitations of the study, considering sources of potential biases and imprecisions, such as non-representativeness of sample, study design, important uncontrolled confounders.                                      | 7   |
| Interpretations            | 15  | Give a cautious overall interpretation of results, based on potential biases and imprecisions and suggest areas for                                                                                                              | 7,8 |



|                        |    |                                                                                                                |     |
|------------------------|----|----------------------------------------------------------------------------------------------------------------|-----|
|                        |    | future research.                                                                                               |     |
| Generalizability       | 16 | Discuss the external validity of the results                                                                   | 7,8 |
| <b>Other sections</b>  |    |                                                                                                                |     |
| Role of funding source | 17 | State whether any funding organization has had any roles in the survey's design, implementation, and analysis. | 12  |
| Conflict of interest   | 18 | Declare any potential conflict of interest.                                                                    | 12  |
| Acknowledgements       | 19 | Provide names of organizations/persons that are acknowledged along with their contribution to the research.    | 12  |
